# Supplementary material
Source: publisher site journal article supplement (https://www.dovepress.com/article/319023)

**Figure S1** Diagram of the experimental design.

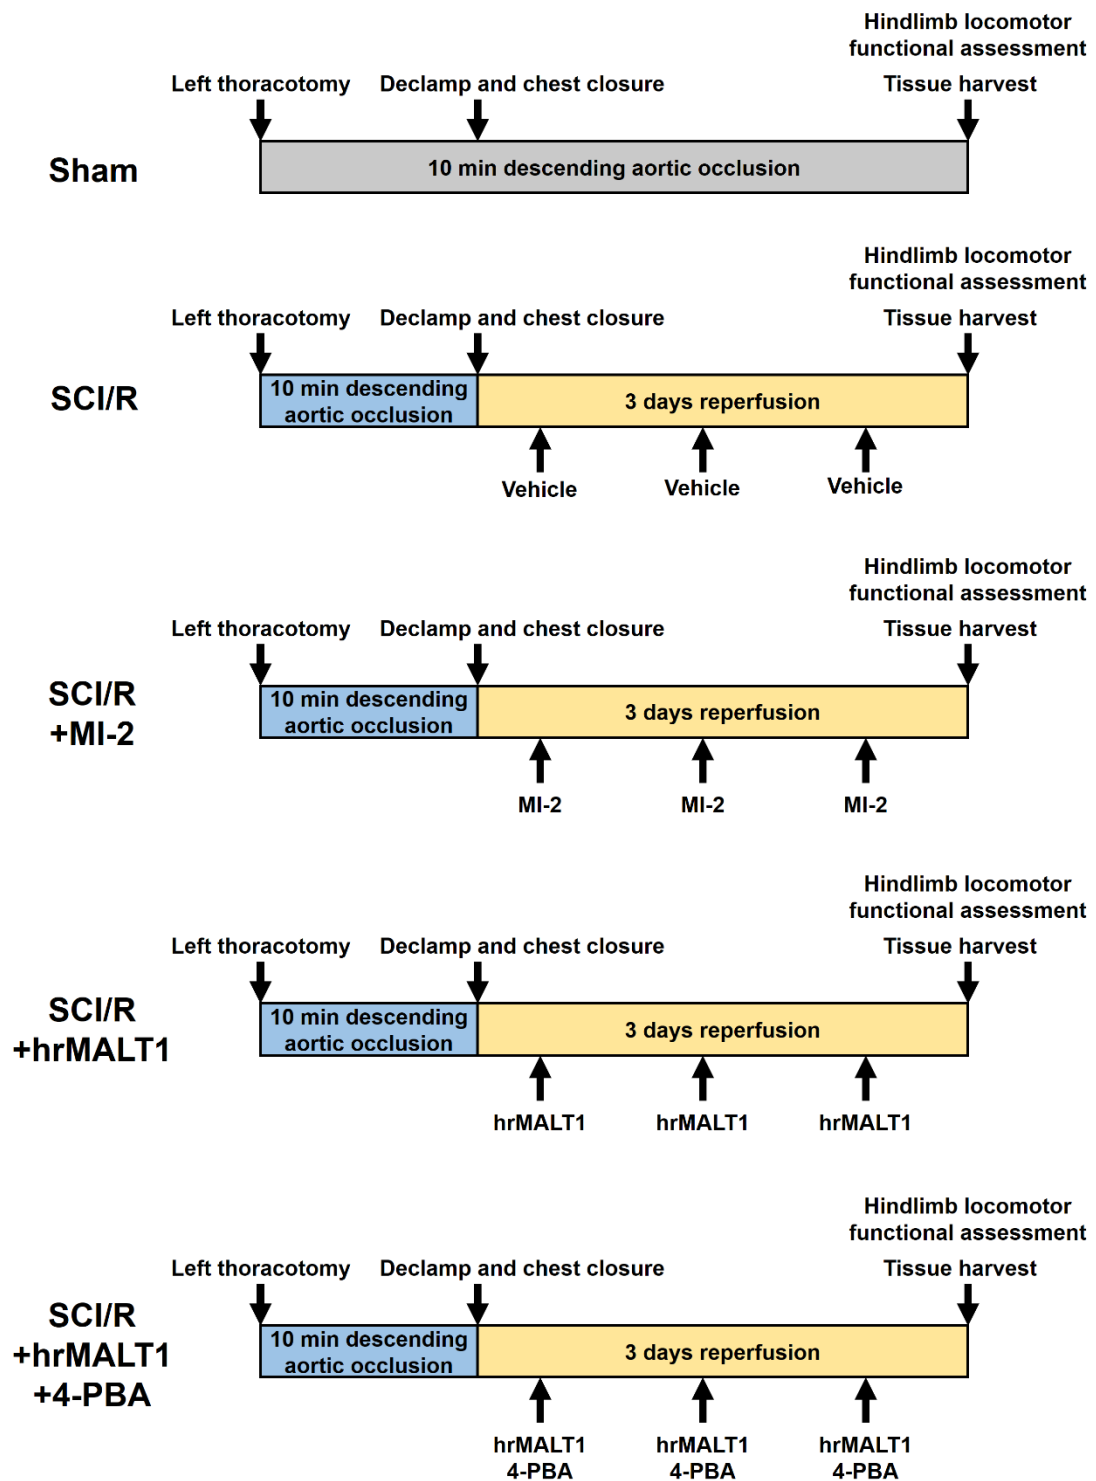

**Figure S2** Real time monitoring the arterial blood pressure (BP) of carotid artery and femoral artery upon clamping and loosening of descending thoracic aorta in rats with spinal cord ischemia-reperfusion surgery. As shown in the figure, the BP of femoral artery decrease around 20 mmHg upon descending thoracic aorta being clamped, while the BP of carotid artery is increased because of baroreflex.

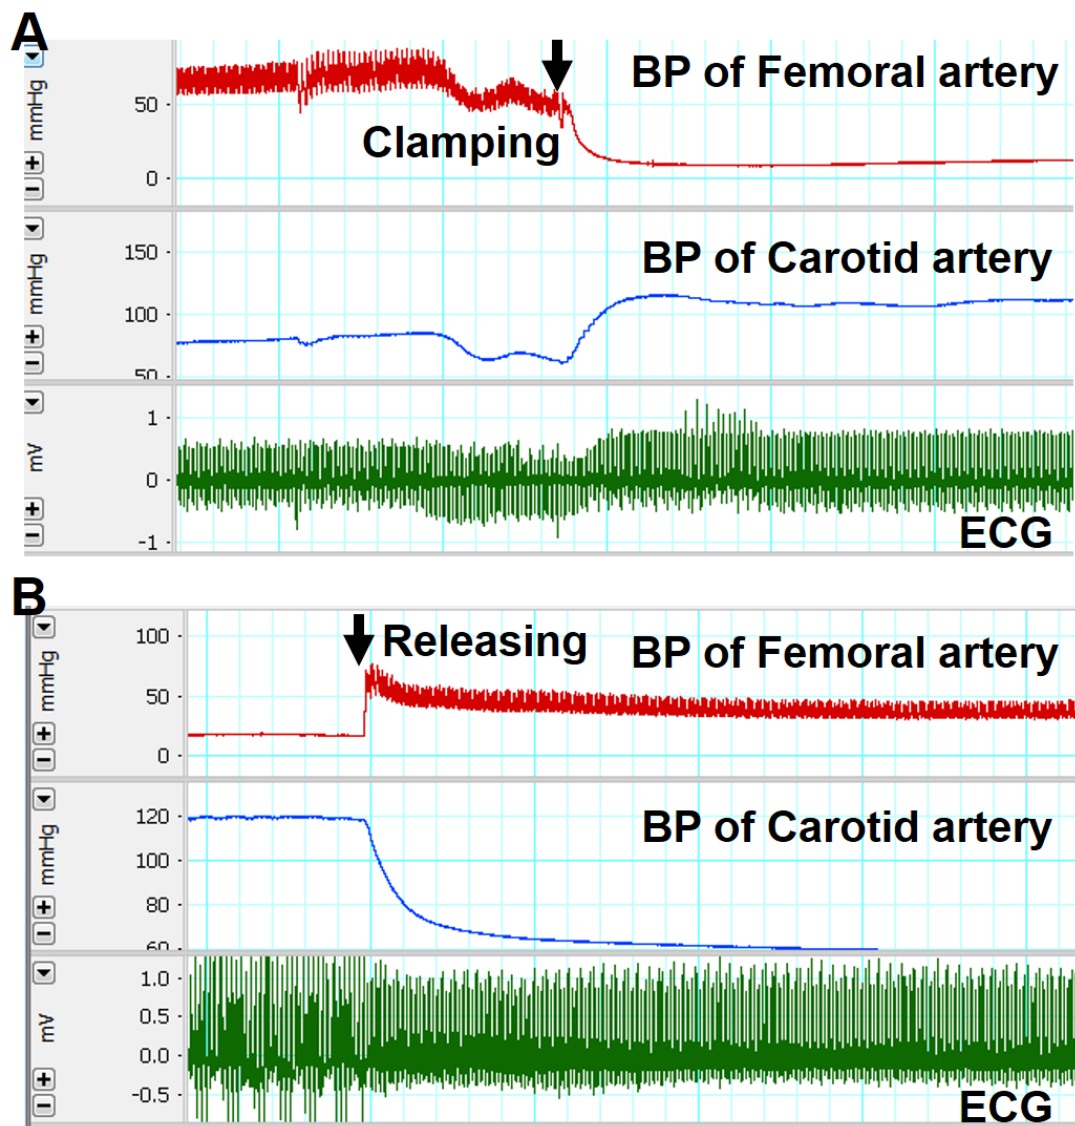

**Figure S3** Western blot analysis of MALT1.

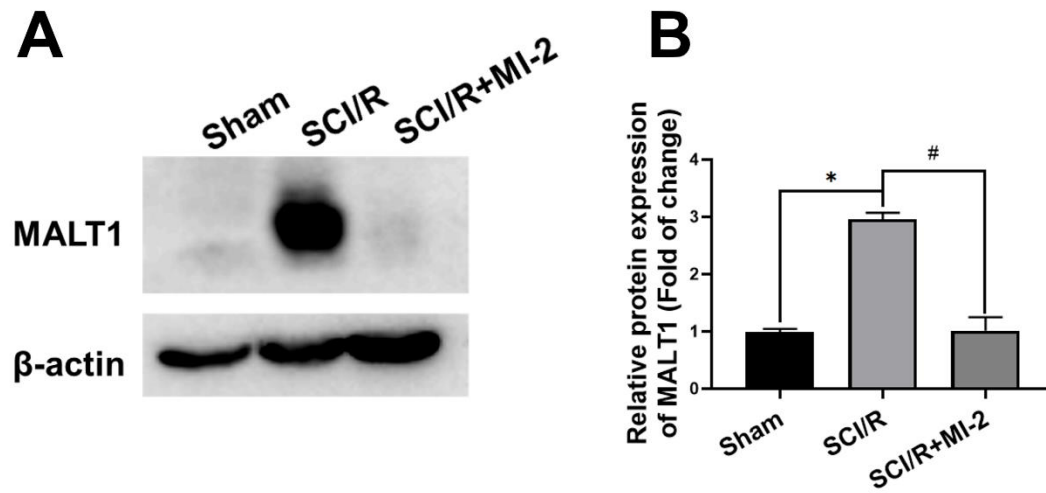

**Figure S4** Western blot analysis of Bip.

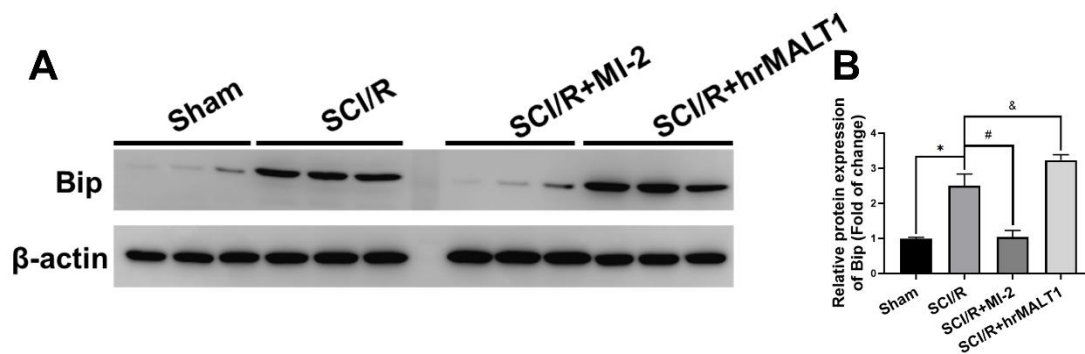

**Figure S5** Quantitative analysis of EB content in spinal cord tissue.

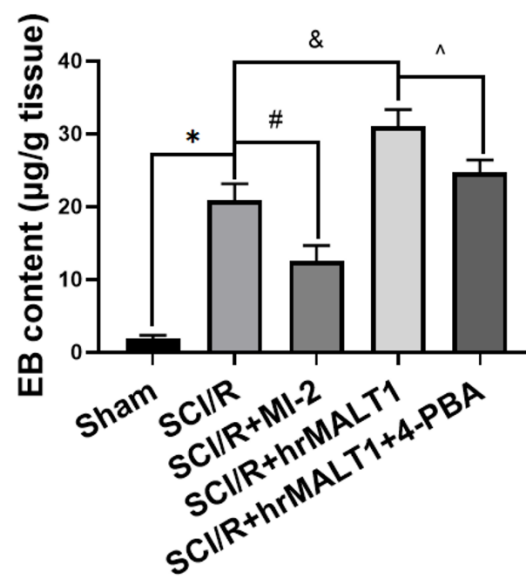

Supplement: Supplementary file 1 [file 27_Jul_2021_Supplementary_data_R1.pdf › 27_Jul_2021_Supplementary_data_R1.pdf]
